# Supplementary material for: Impact of regional Northern Hemisphere mid-latitude anthropogenic sulfur dioxide emissions on local and remote tropospheric oxidants
Source: Copernicus journal article supplement (doi:10.5194/acp-21-6799-2021), 2021-05-05
Supplement: Supplementary file 1 [file acp-21-6799-2021-supplement.pdf]

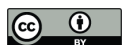

*Supplement of*

## **Impact of regional Northern Hemisphere mid-latitude anthropogenic sulfur dioxide emissions on local and remote tropospheric oxidants**

**Daniel M. Westervelt et al.**

*Correspondence to:* Daniel M. Westervelt ([danielmw@ldeo.columbia.edu](mailto:danielmw@ldeo.columbia.edu))

The copyright of individual parts of the supplement might differ from the article licence.

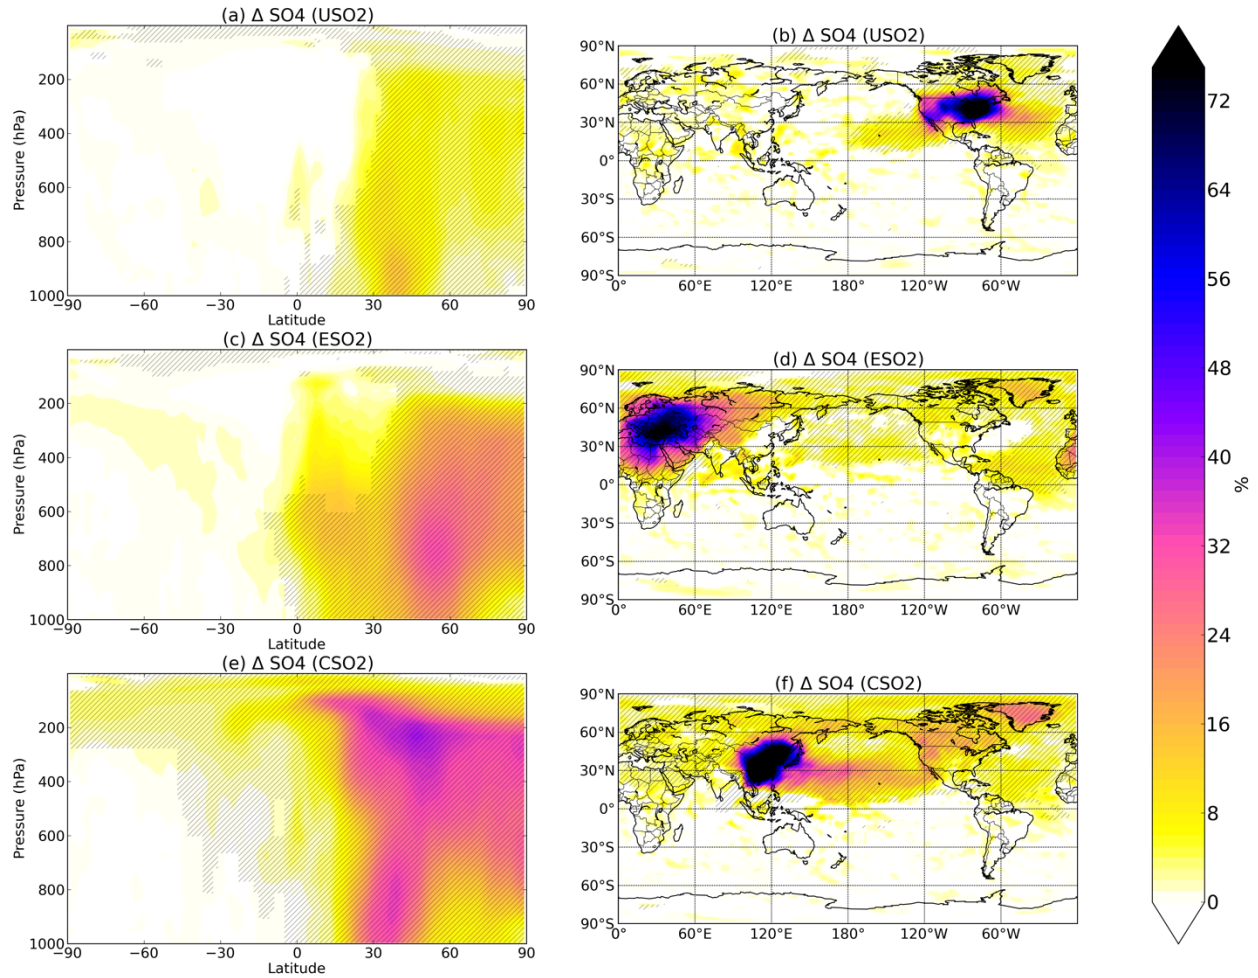

Figure S1: Boreal summer (JJA) mean percent change in sulfate concentration between a control simulation and a perturbation simulation in which anthropogenic SO<sub>2</sub> emissions are removed over a certain region: (a,b) US, (c,d) Europe, and (e,f) China. Hatching denotes statistical significance according to a Student's t-test at the 95% confidence level.

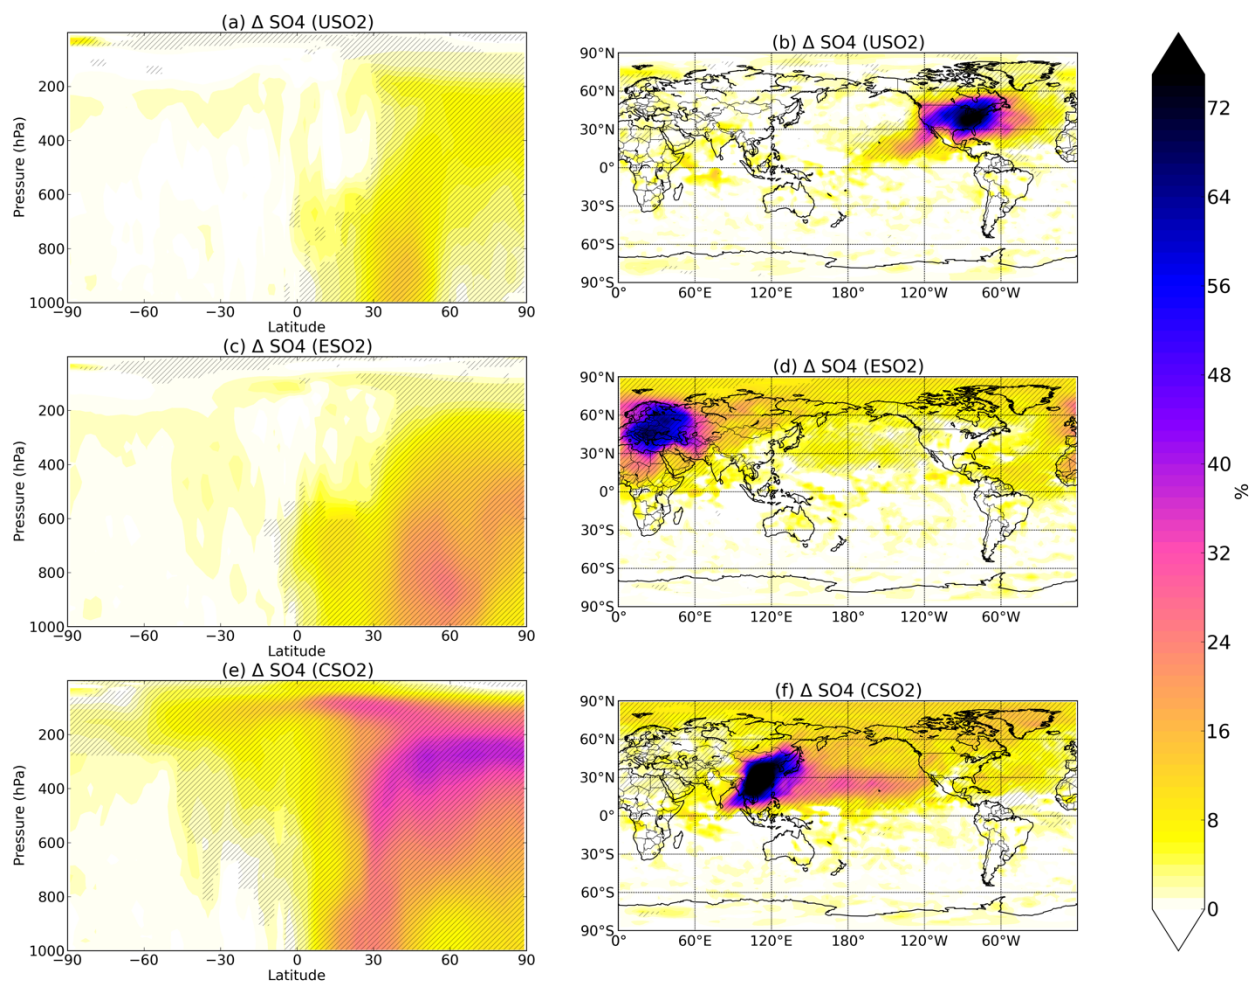

Figure S2: As in Figure S1 but for boreal autumn (SON).

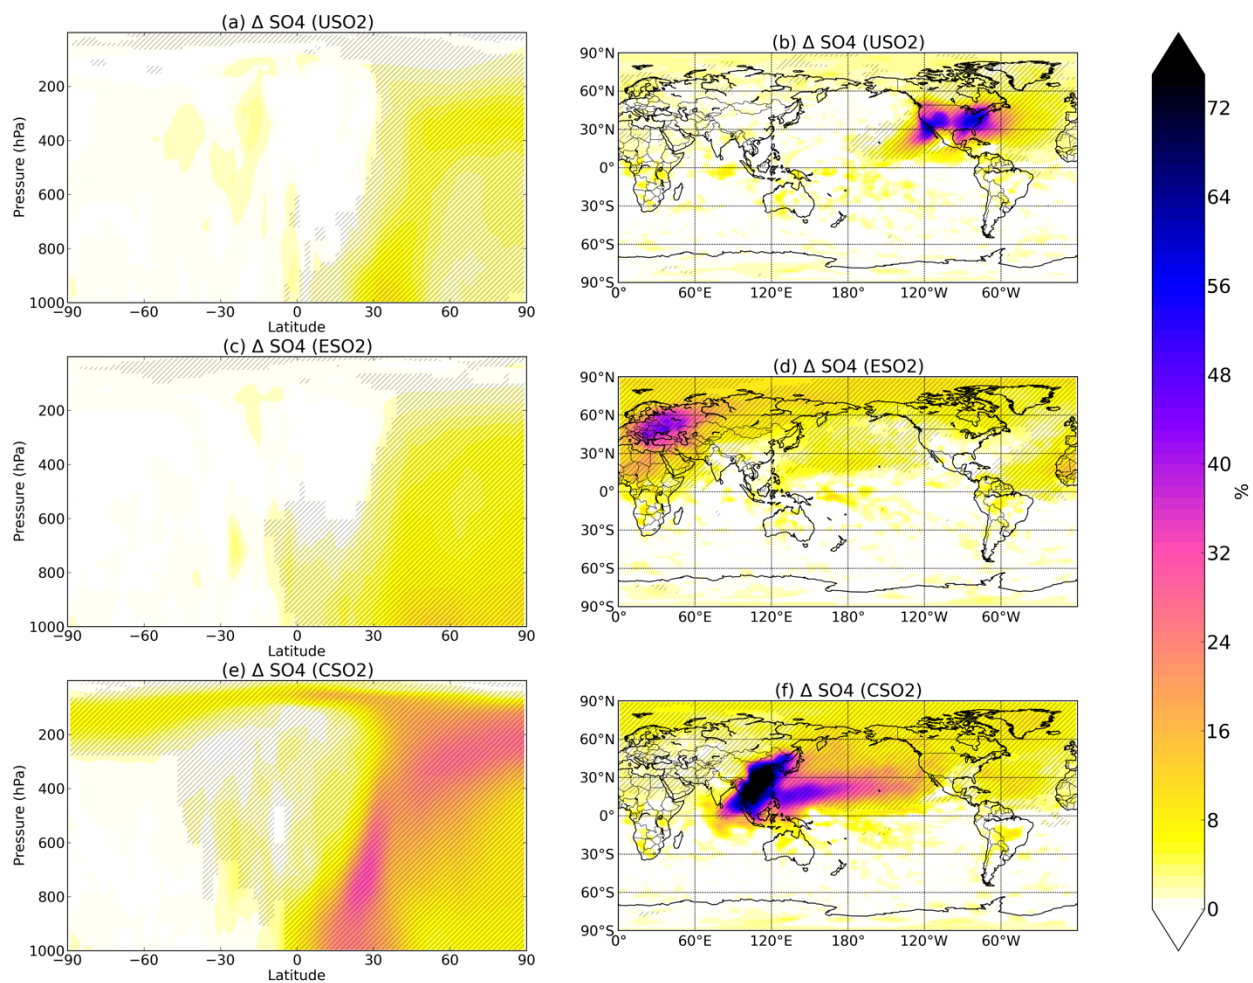

Figure S3: As in Figure S1 but for boreal winter (DJF).



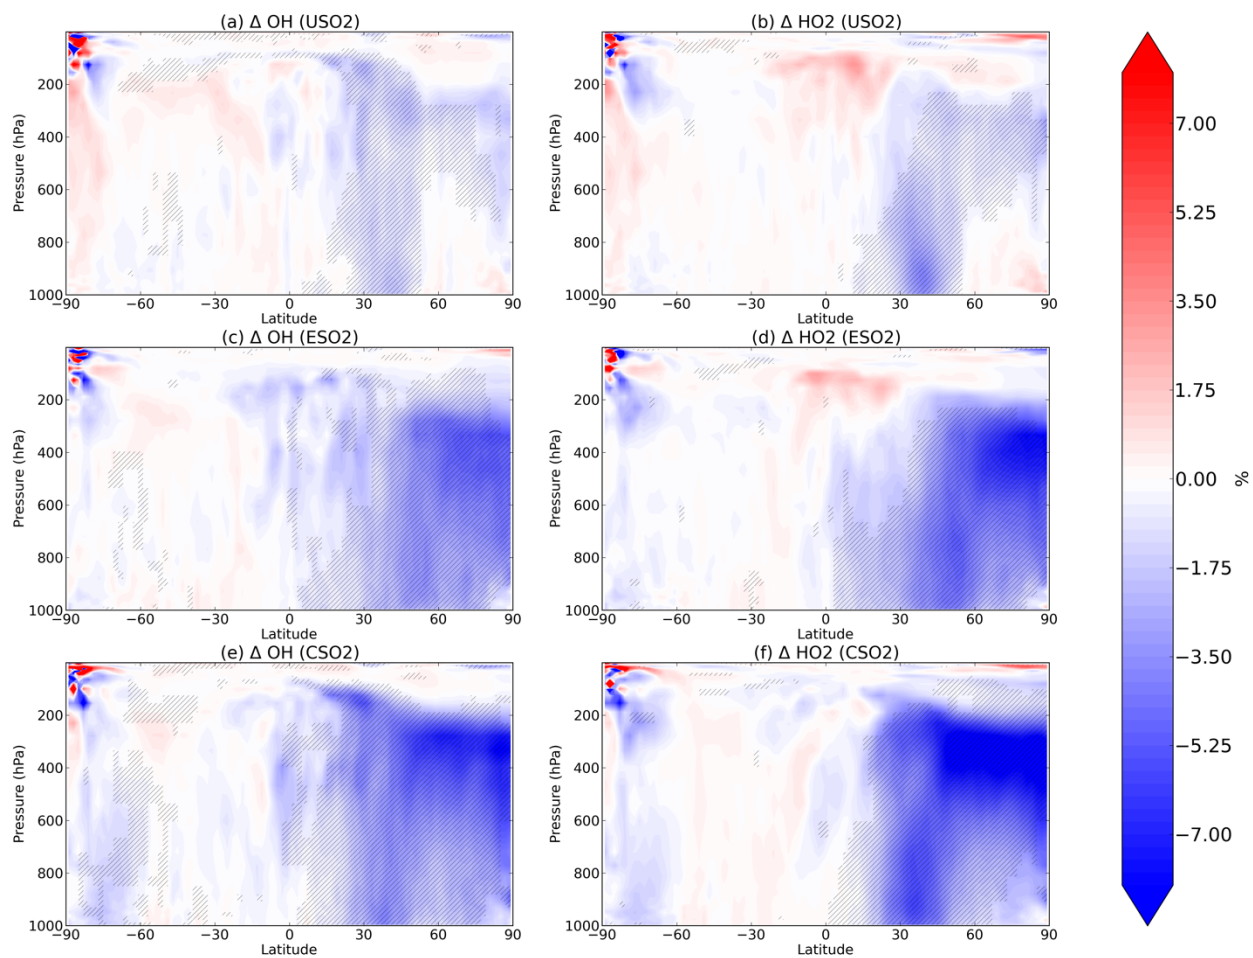

Figure S4: Boreal summer (JJA) mean percent change in OH (left column) and HO<sub>2</sub> (right column) between a control simulation and a perturbation simulation in which anthropogenic SO<sub>2</sub> emissions are removed over a certain region: (a,b) US, (c,d) Europe, and (e,f) China. Hatching denotes statistical significance according to a Student's t-test at the 95% confidence level.

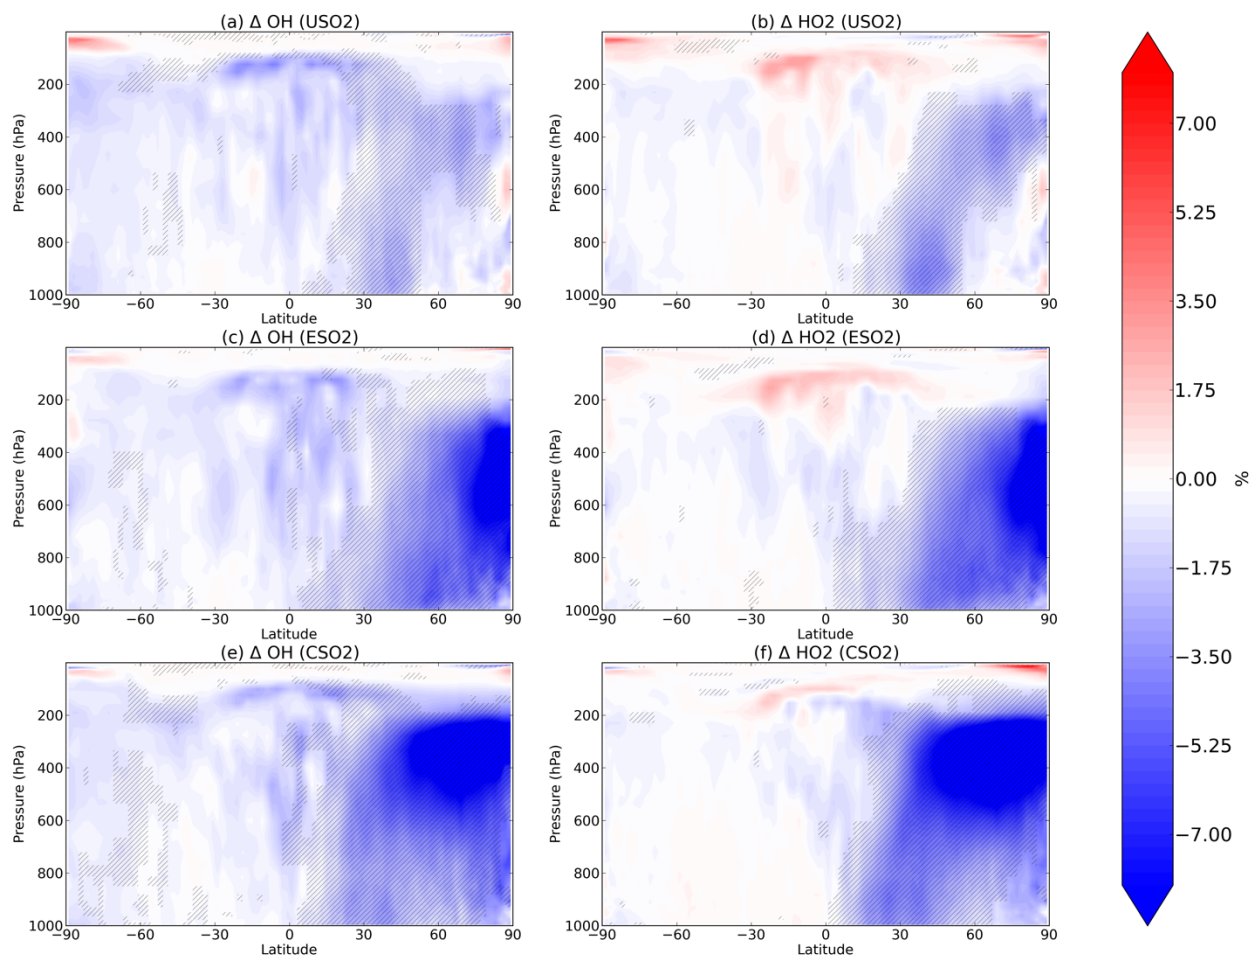

Figure S5: As in Figure S4 but for boreal autumn (SON).

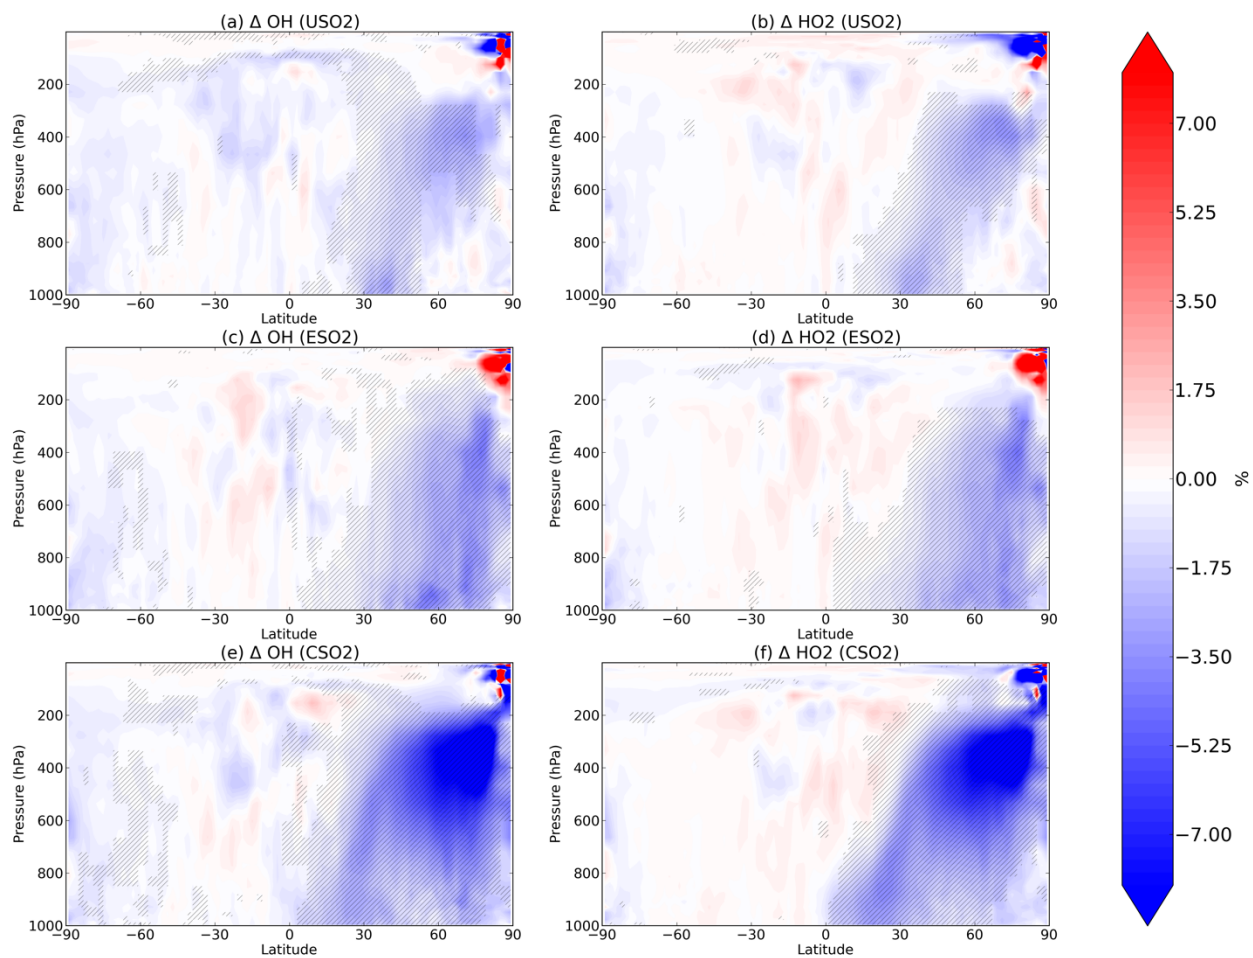

Figure S6: As in Figure S4 but for boreal winter (DJF).

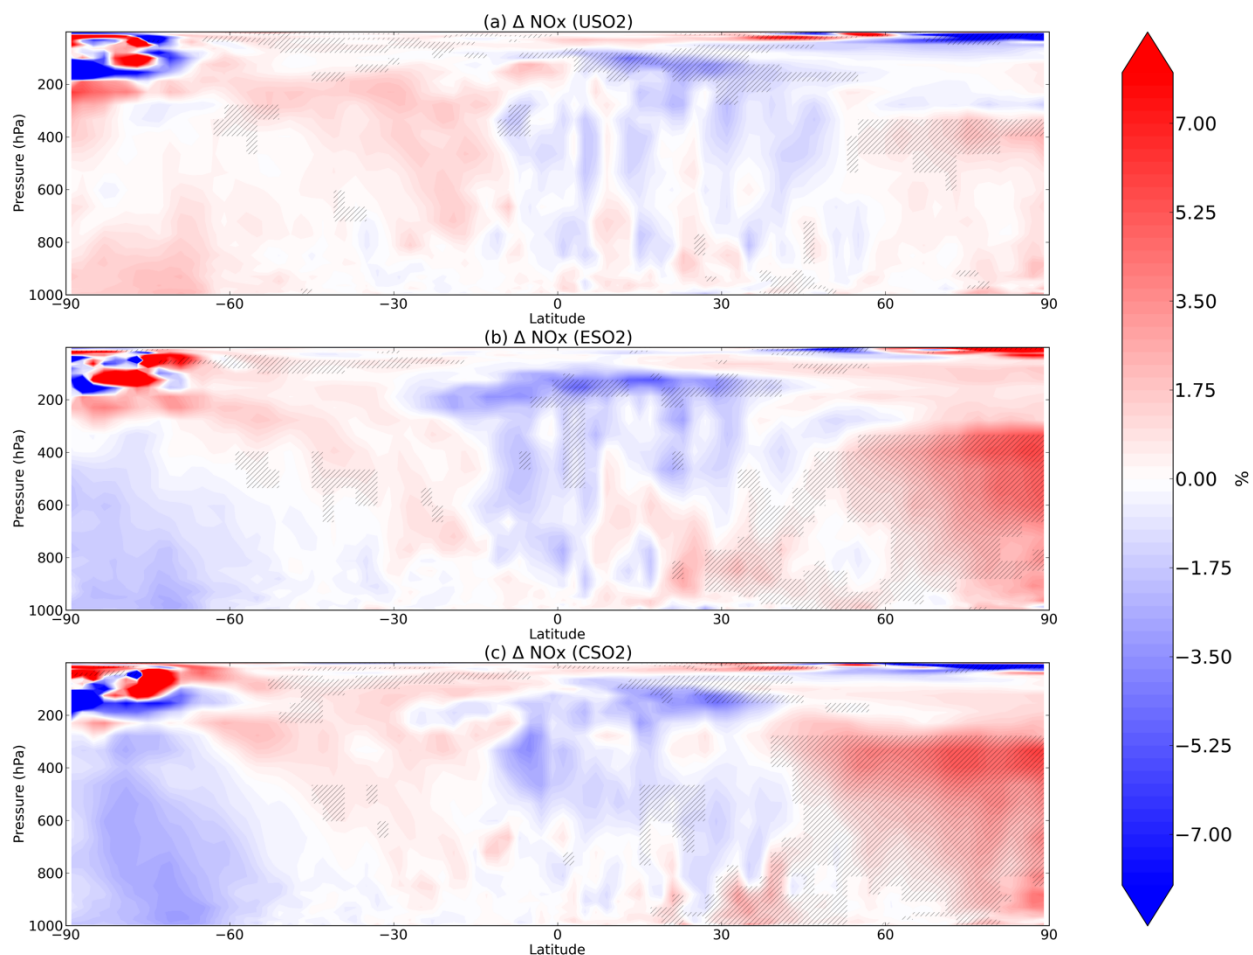

Figure S7: Boreal summer (JJA) mean percent change in  $\text{NO}_x$  between a control simulation and a perturbation simulation in which anthropogenic  $\text{SO}_2$  emissions are removed over a certain region: (a) US, (b) Europe, and (c) China. Hatching denotes statistical significance according to a Student's t-test at the 95% confidence level.



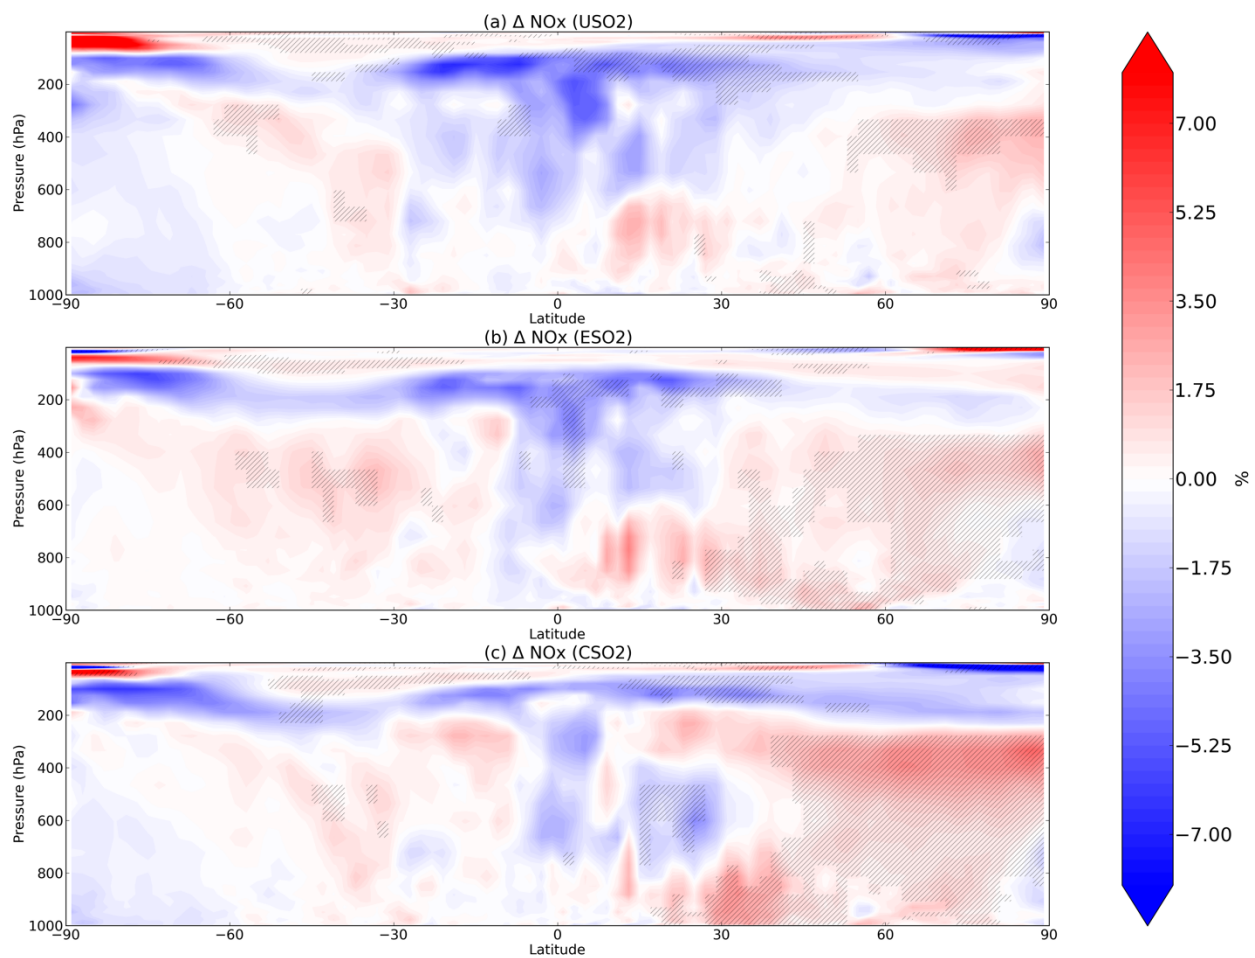

Figure S8: As in Figure S7 but for boreal autumn (SON).

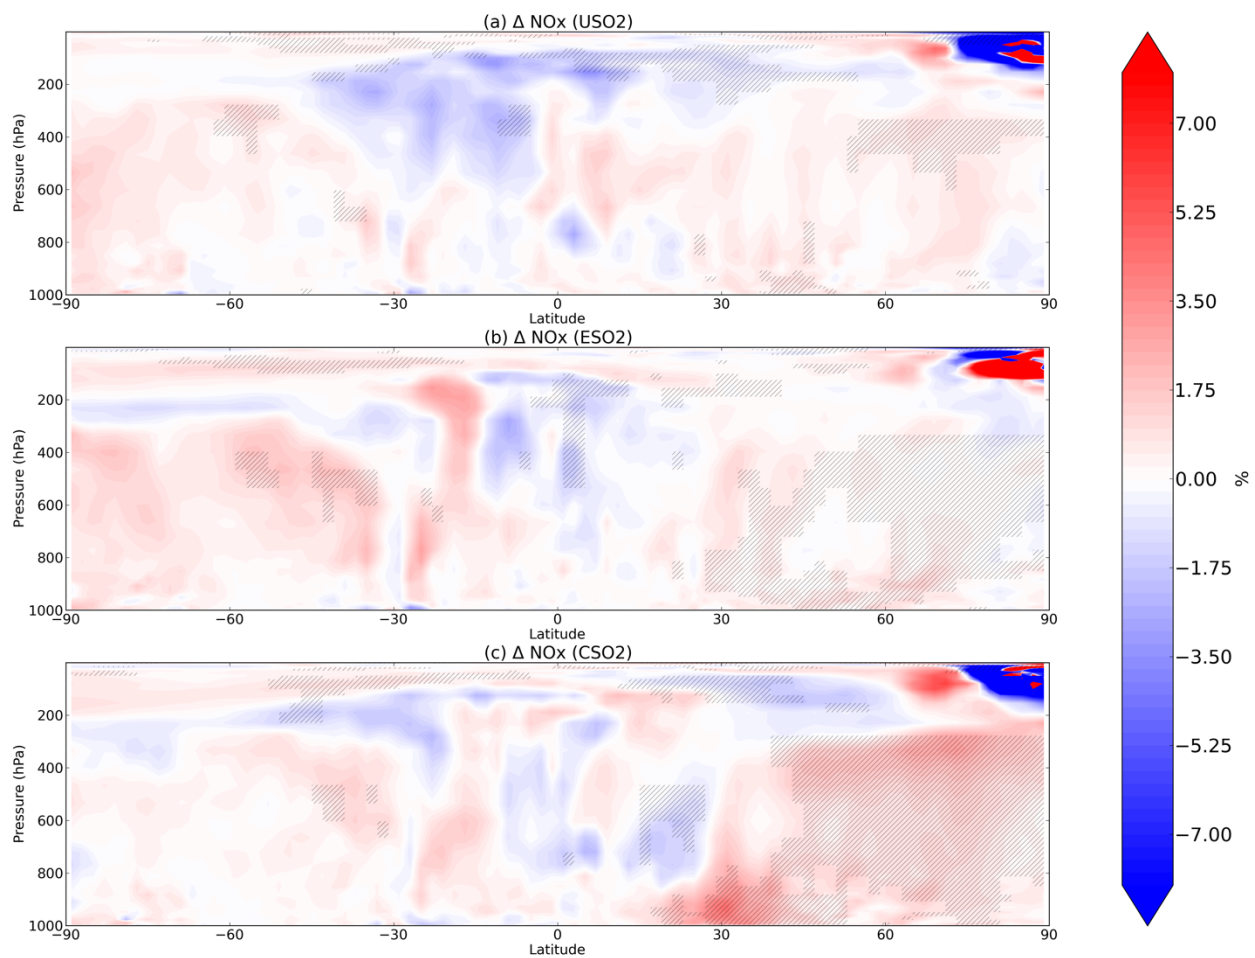

Figure S9: As in Figure S7 but for boreal winter (DJF).

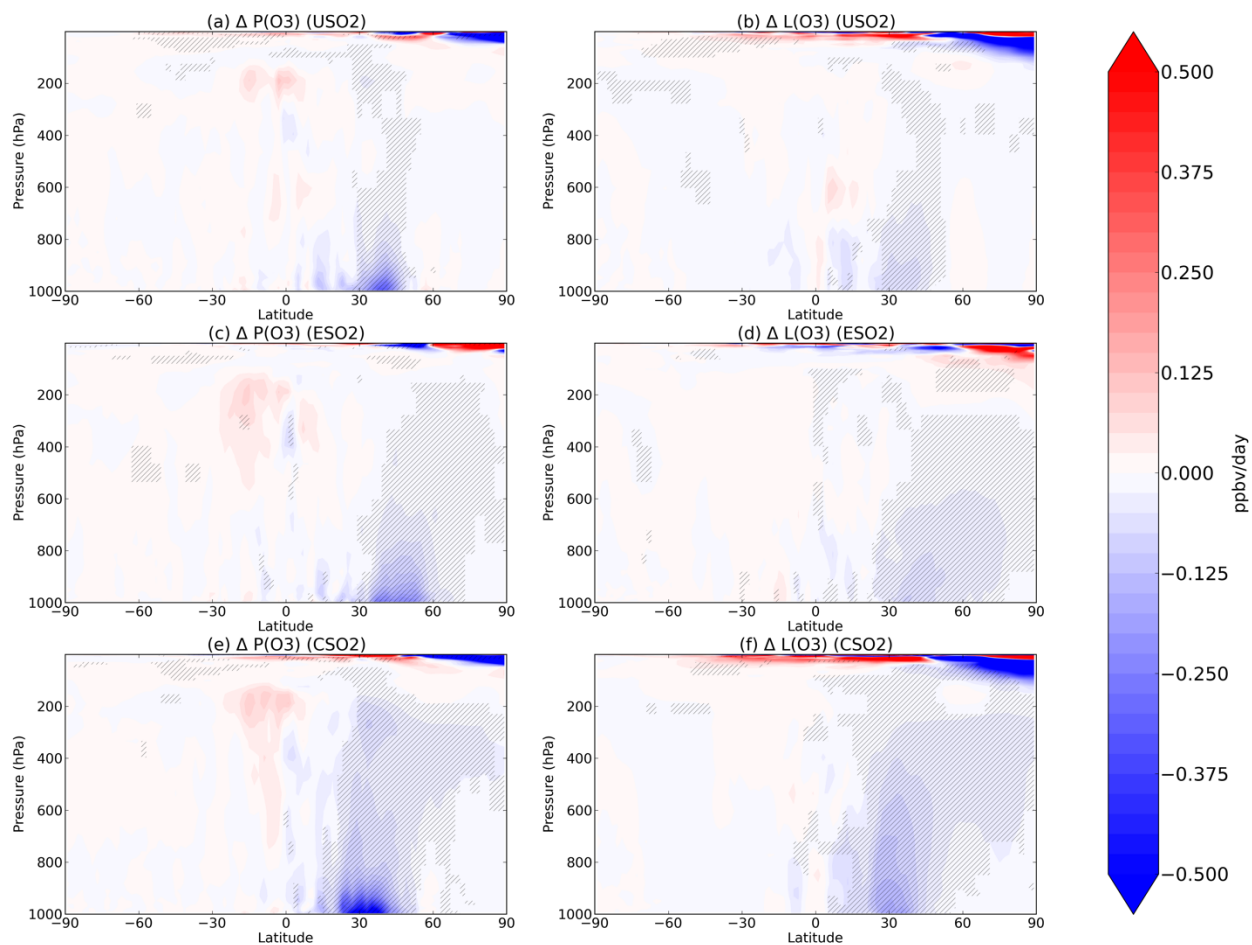

Fig. S10. Change in MAM O<sub>3</sub> production (left column) and loss (right column) for each of the SO<sub>2</sub> emission perturbation simulations (rows). Units are in ppbv day<sup>-1</sup>. Hatching denotes statistical significance according to a Student's t-test at the 95% confidence level.

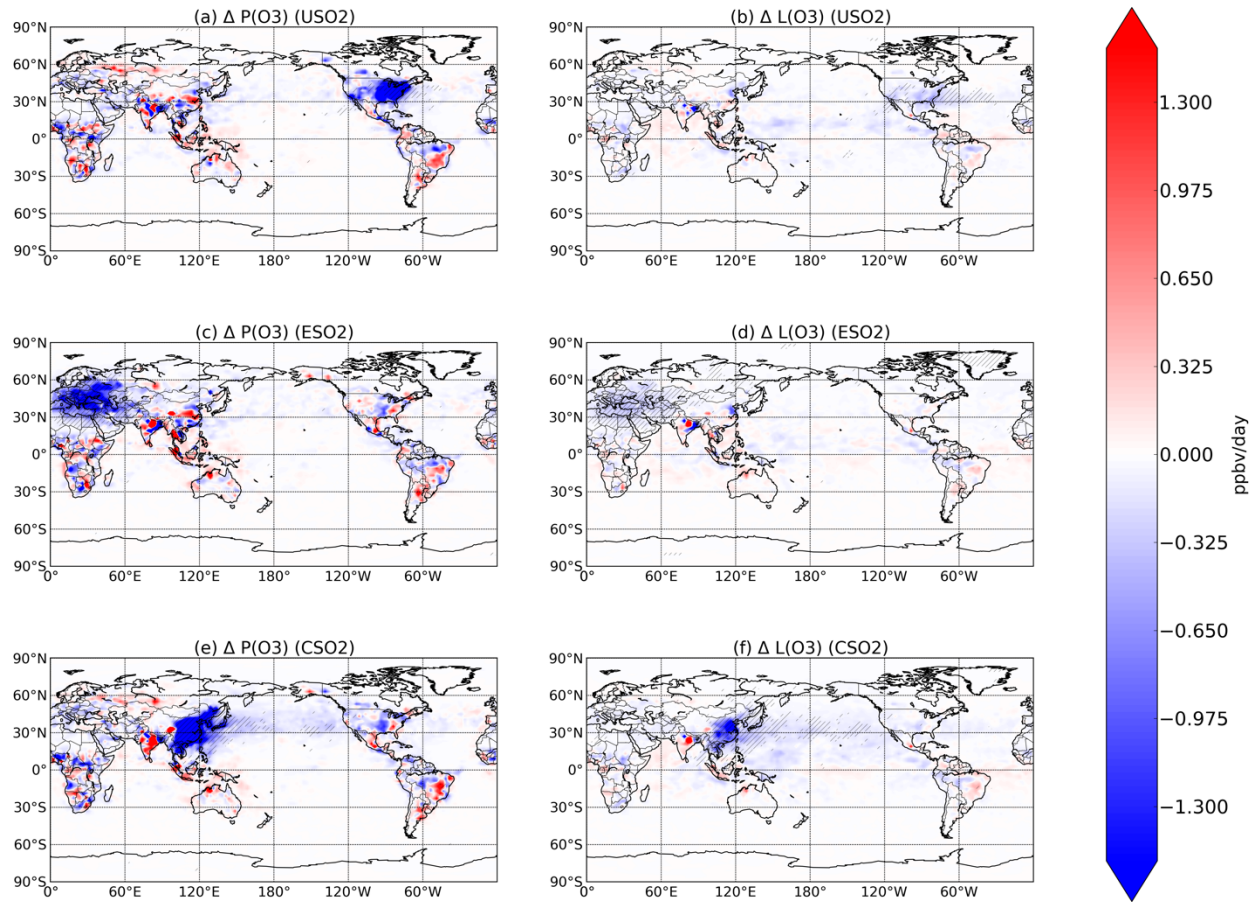

Fig. S11: Change in MAM O<sub>3</sub> production (left column) and loss (right column) for each of the SO<sub>2</sub> emission perturbation simulations (rows). Units are in ppbv day<sup>-1</sup>. Hatching denotes statistical significance according to a Student's t-test at the 95% confidence level.



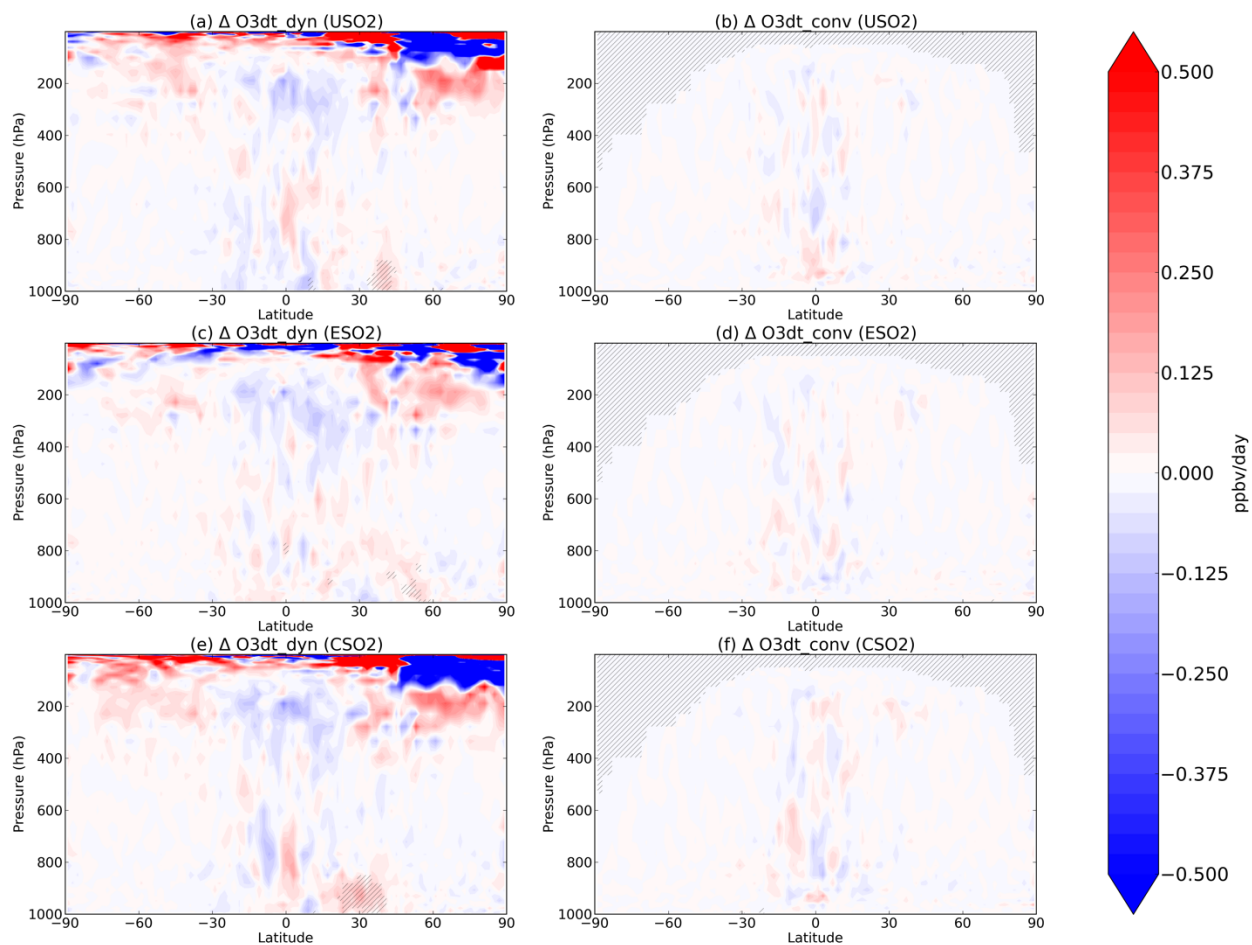

Fig. S12. Change in O<sub>3</sub> advective (left column) and convective (right column) tendency for each of the SO<sub>2</sub> emission perturbation simulations (rows). Units are in ppbv day<sup>-1</sup>. Hatching denotes statistical significance according to a Student's t-test at the 95% confidence level.

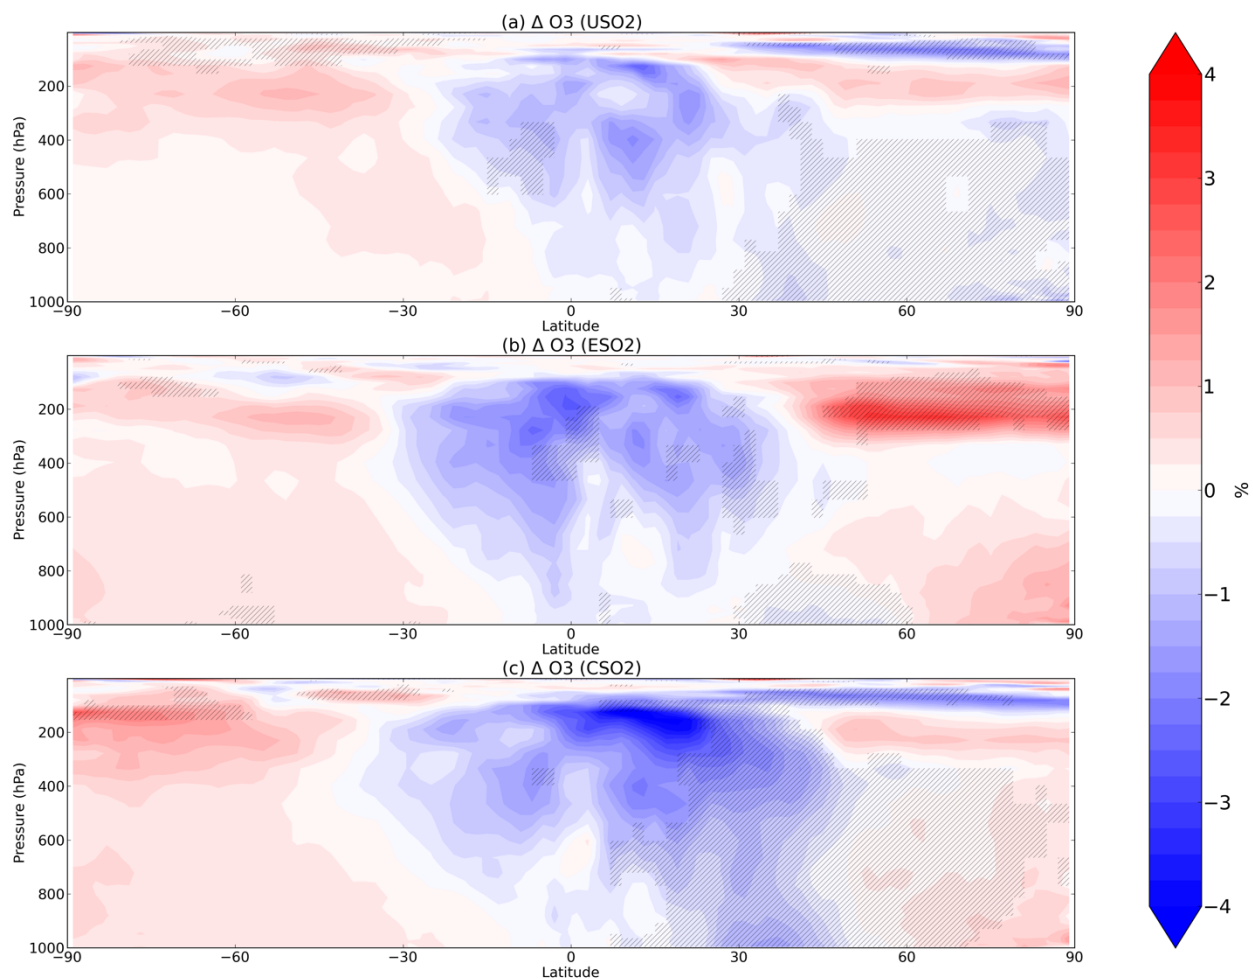

Figure S13: Boreal summer (JJA) mean percent change in O<sub>3</sub> between a control simulation and a perturbation simulation in which anthropogenic SO<sub>2</sub> emissions are removed over a certain region: (a) US, (b) Europe, and (c) China. Hatching denotes statistical significance according to a Student's t-test at the 95% confidence level.

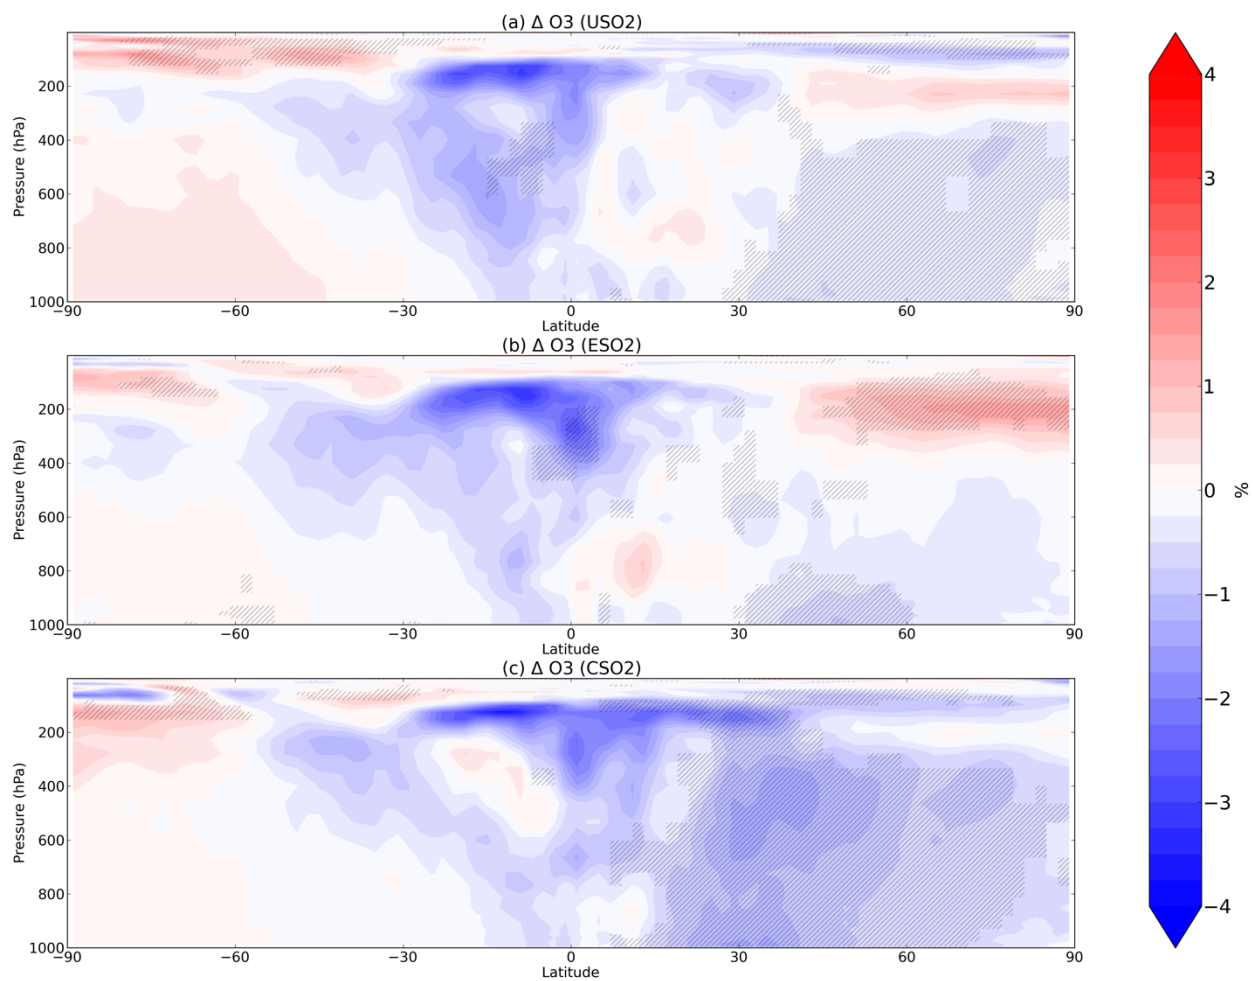

Figure S14: As in Figure S13 but for boreal autumn (SON).

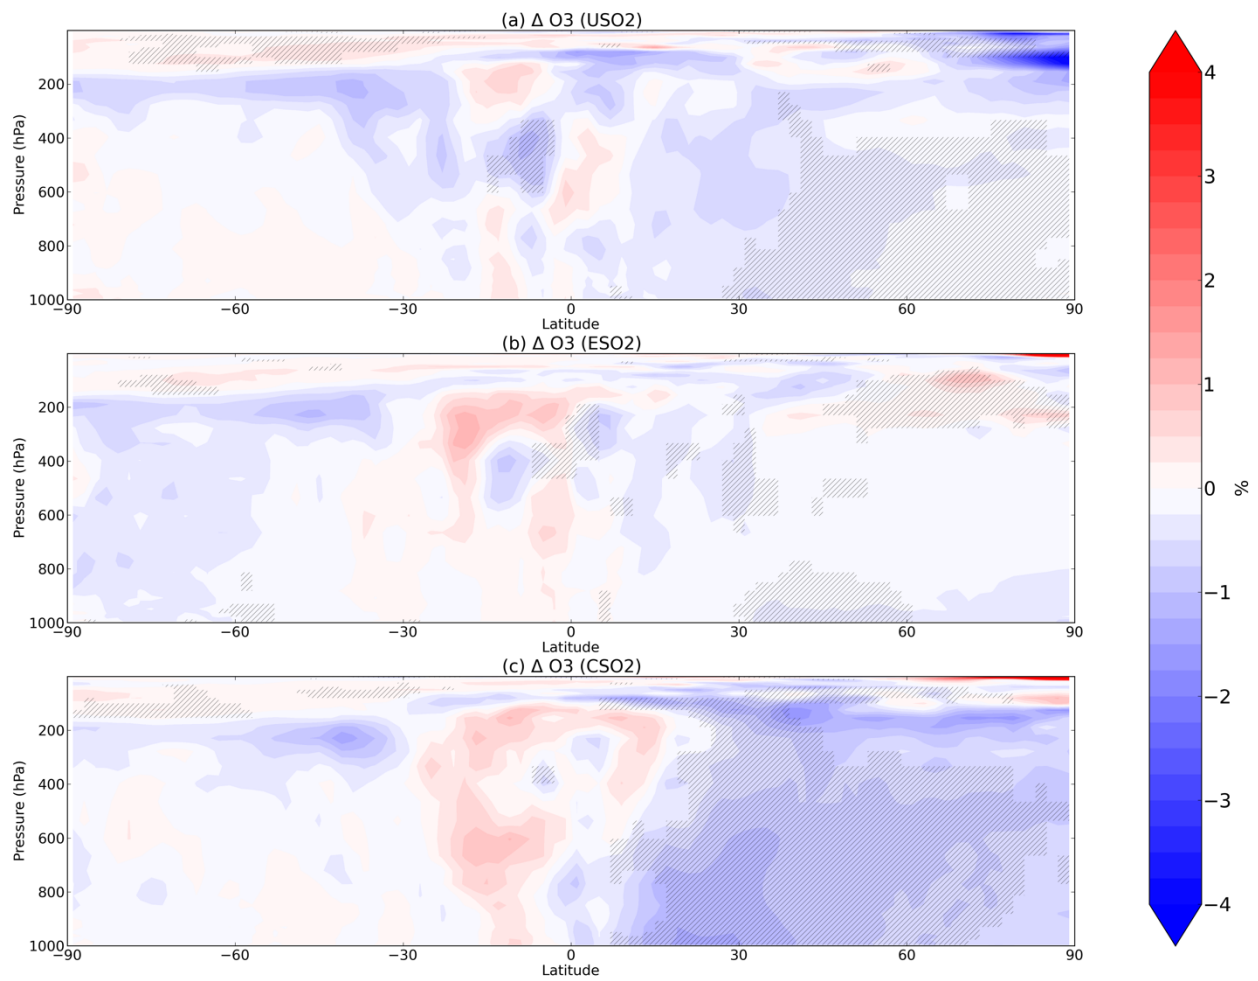

Figure S15: As in Figure S13 but for boreal winter (DJF).
